# Supplementary material
Source: PubMed Central journal article supplement (PMC7242713)
Supplement: supp_RA120.013359_159339_1_supp_507148_q8fqfb.pdf [file supp_RA120.013359_159339_1_supp_507148_q8fqfb.pdf]

## Supporting Information

### **Deoxyribozyme-based method for absolute quantification of N<sup>6</sup>-methyladenosine fractions at specific sites of RNA**

Magda Bujnowska<sup>1</sup>, Jiacheng Zhang<sup>2</sup>, Qing Dai<sup>3</sup>, Emily M. Heideman<sup>1</sup> and Jingyi Fei<sup>1,2</sup>

<sup>1</sup>Department of Biochemistry and Molecular Biology, <sup>2</sup>Institute for Biophysical Dynamics, <sup>3</sup>Department of Chemistry, The University of Chicago, Chicago, IL 60637, USA  
Corresponding author: [jingyifei@uchicago.edu](mailto:jingyifei@uchicago.edu)

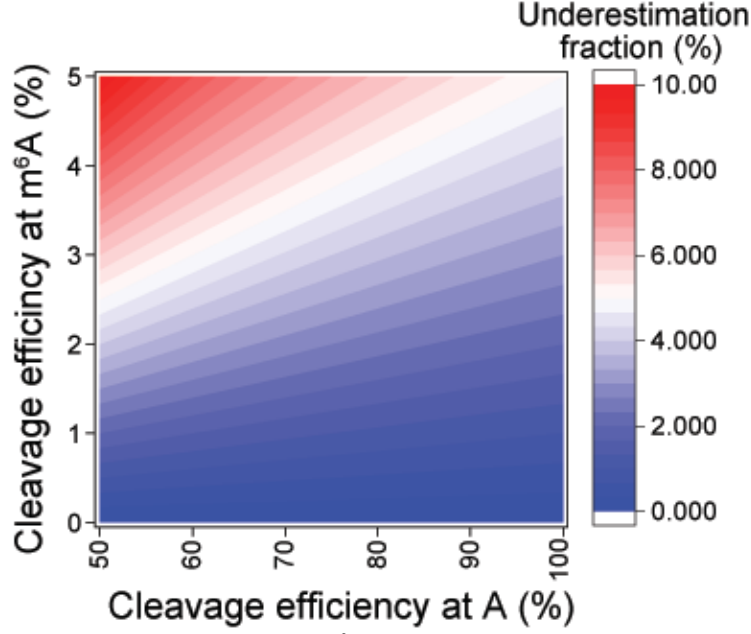

**FIGURE S1.** Percentage of underestimation of  $m^6A$  fraction due to cleavage of DR on  $m^6A$  sequence. The trace amount of cleavage of DR at  $m^6A$  containing sequence will cause false negative signal in the cleavage reaction and underestimation of the  $m^6A$  percentage. Considering DR cleavage efficiencies of the unmethylated A and  $m^6A$  sequence are  $F_{DR}$  and  $F'_{DR}$  respectively, and the true  $m^6A$  fraction is  $F'_m$ ,

$$(1 - F'_m)F_{DR} + F'_m F'_{DR} = 1 - 2^{-\Delta\Delta Ct},$$

where  $\Delta\Delta Ct$  is determined in Eq (2). Comparing  $F'_m$  to  $F_m$  from Eq (7) determined without the correction of  $F'_{DR}$ , the percentage of underestimation is

$$\frac{F'_m - F_m}{F'_m} = \frac{F'_{DR}}{F_{DR}}.$$

The heat map shows the percentage of underestimation as a function of  $F_{DR}$  and  $F'_{DR}$ , which increases when  $F_{DR}$  decreases, assuming  $F'_{DR}$  remains lower than 5%. When  $F_{DR}$  is 50% and  $F'_{DR}$  is 5%, the error in  $m^6A$  fraction is 10%.

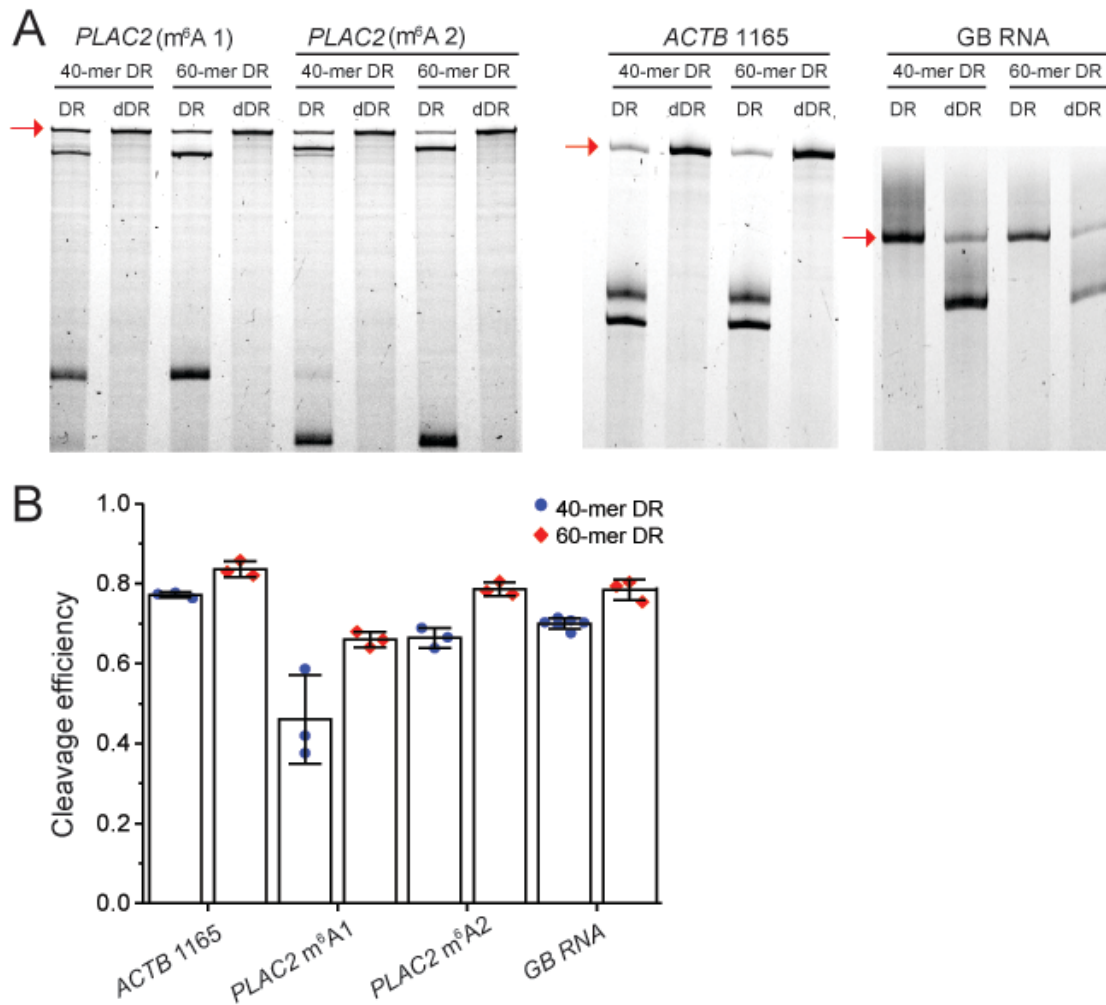

**FIGURE S2.** Cleavage efficiencies ( $F_{DR}$ ) of unmodified *in vitro* transcribed RNA by 40-mer and 60-mer DR and dDR. (A) PAGE showing the DR cleavage of *PLAC2* m<sup>6</sup>A1 and m<sup>6</sup>A2 sites, *ACTB* 1165, and GB RNA by 40-mer and 60-mer DR. (B) Bar plot of the cleavage efficiencies of *PLAC2* m<sup>6</sup>A1 and m<sup>6</sup>A2, *ACTB* 1165, and the GB RNA by 40-mer and 60-mer DR as quantified from (A). Error bars indicate mean  $\pm$  s.d. for 3 independent DR cleavage reactions. Red arrows point to full-length uncleaved RNA fragments. All gel splice sites are separate by white space.

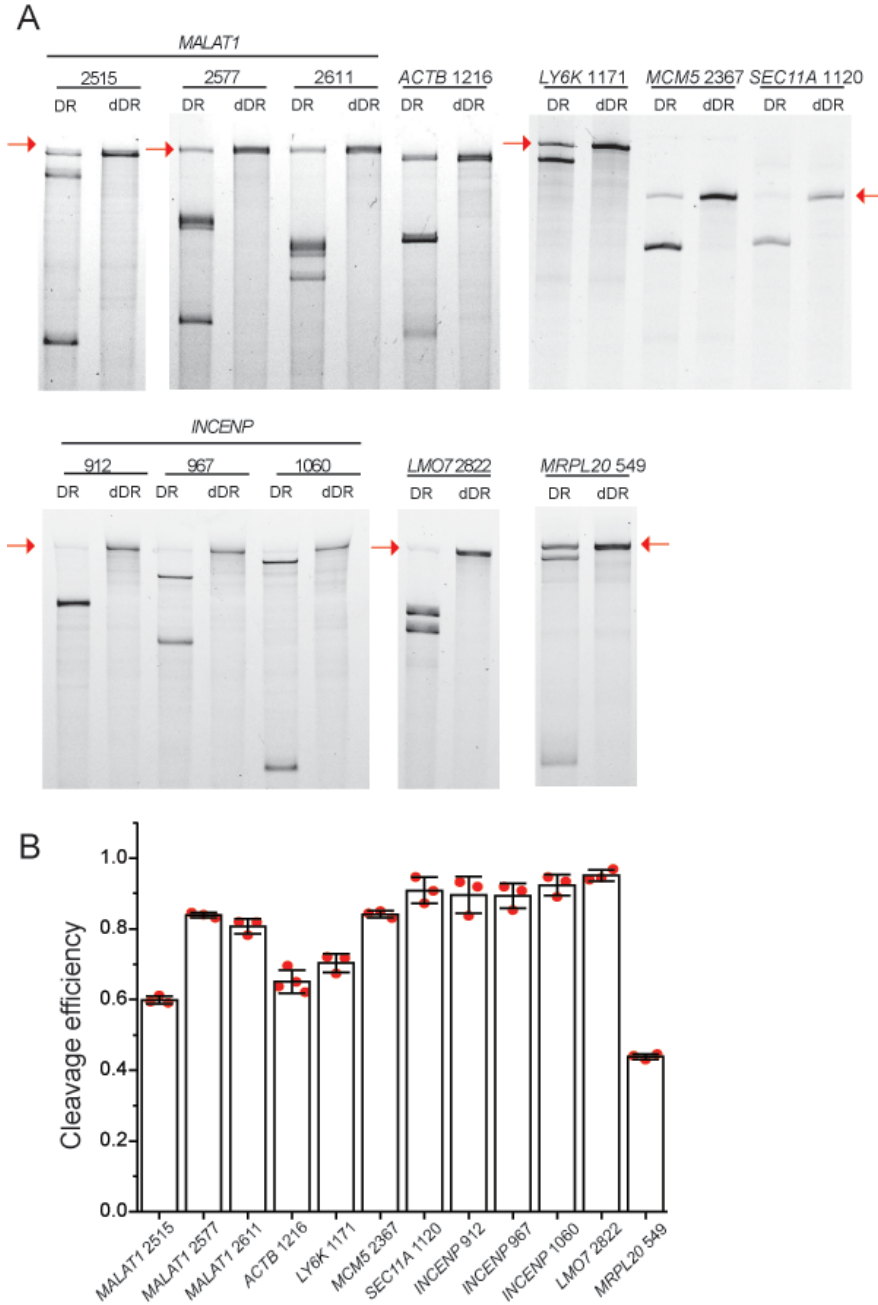

**FIGURE S3.** Cleavage efficiencies ( $F_{DR}$ ) of unmodified *in vitro* transcribed RNA by 60-mer DR and dDR. (A) PAGE showing the DR cleavage of the seven endogenous targets: *MALAT1* 2515, 2577, and 2611, *ACTB* 1216, *LY6K* 1171, *MCM5* 2367, *SEC11A* 1120, *INCENP* 912, 967 and 1060, *LMO7* 2822, and *MRPL20* 549. (B) Bar plot of the cleavage efficiencies of endogenous targets as quantified from (A). Error bars indicate mean  $\pm$  s.d. for 3 DR cleavage reactions. Red arrows point to full-length uncleaved RNA fragments. All gel splice sites are separate by white space.

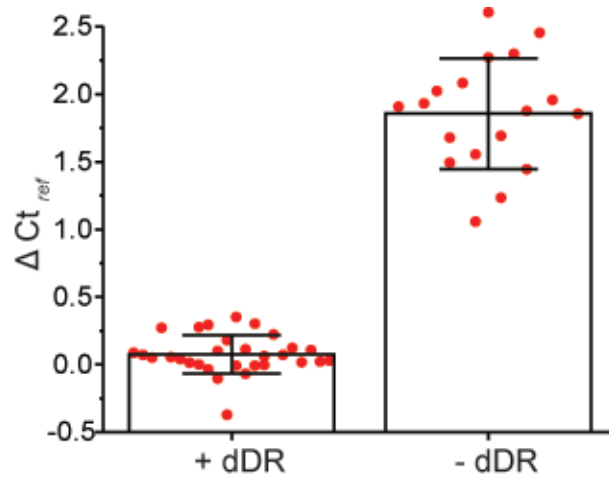

**FIGURE S4.** Negative control without DR and with non-functional version of DR (dDR). When the negative control does not contain DR, there is a consistent difference between  $Ct_{+DR-ref}$  and  $Ct_{-DR-ref}$  ( $\Delta Ct_{ref}$ ), with  $Ct_{-DR-ref}$  being larger. Use of dDR in the negative control eliminates  $\Delta Ct_{ref}$ . Data comes from quantification of GB RNA with 0.0, 0.2, 0.4, 0.6, 0.8, and 1.0 m<sup>6</sup>A fraction input. Error bars indicate mean  $\pm$  s.d.

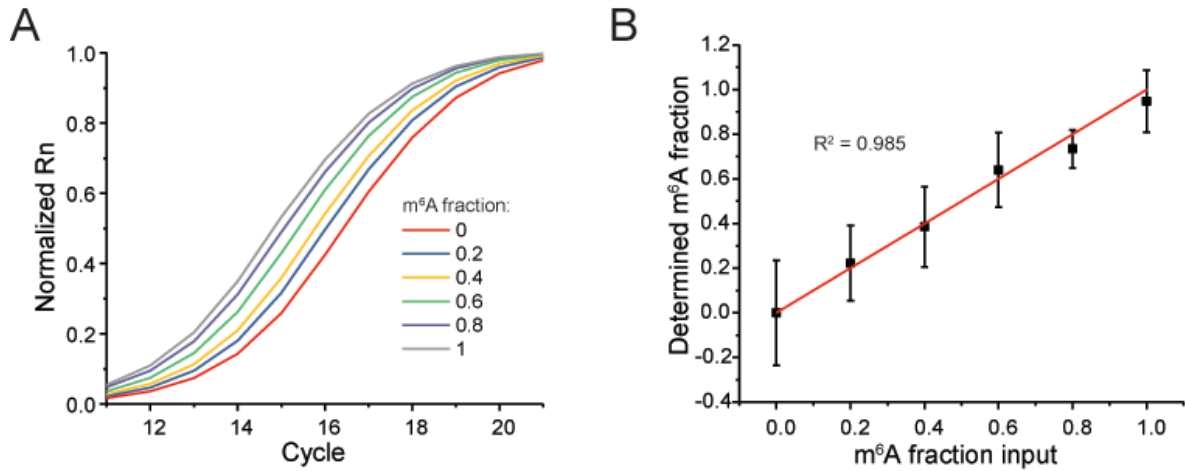

**FIGURE S5.** Validation of the method for absolute quantification of m<sup>6</sup>A fraction of the GB RNA without dDR. (A) Normalized real-time fluorescence amplification curves for the DR cleaved synthetic RNAs with primers amplifying the m<sup>6</sup>A site. (B) Estimated modification fraction as a function of input m<sup>6</sup>A fraction for the GB RNA. Error bars indicate mean  $\pm$  s.d. for 3 biological replicates.

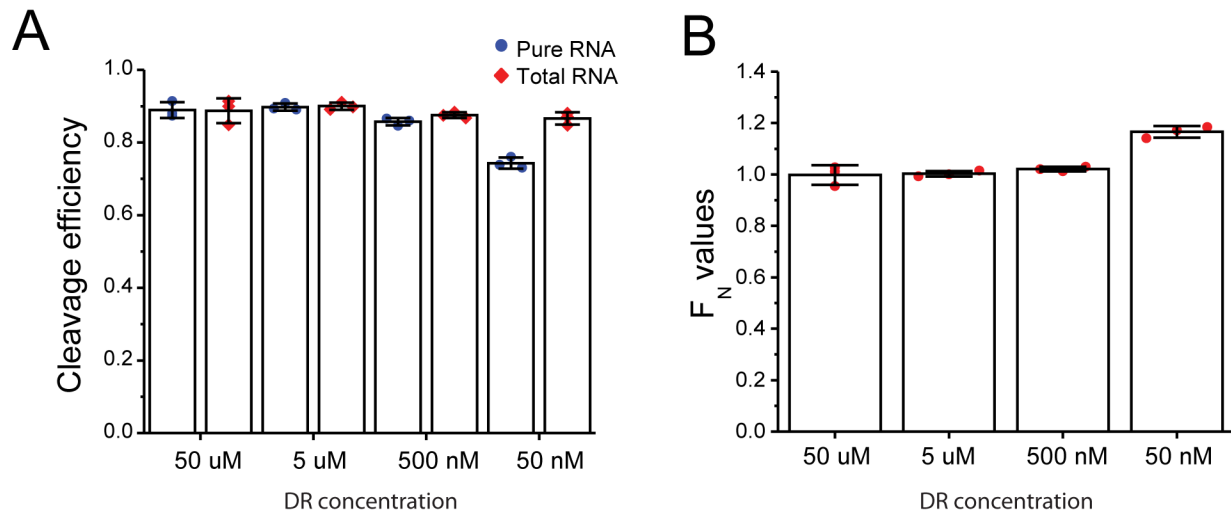

**FIGURE S6.** The dependence of cleavage efficiency on the concentration of DR. (A) The cleavage efficiencies of *PLAC2* m<sup>6</sup>A 2 DR in presence and absence of total RNA with varying concentrations of DR. The concentration of the pure RNA was fixed at 50 nM, whereas the concentration of spike-in RNA in to the total RNA was fixed at 1 ng *PLAC2* RNA in 500 ng total RNA to better mimic the abundance of endogenous RNA. (B)  $F_N$  correction values for varying concentrations of *PLAC2* m<sup>6</sup>A DR as determined from cleavage efficiencies in (A). All error bars report mean  $\pm$  s.d. for 3 biological replicates. The cleavage efficiency of pure RNA is lower when using 50nM of DR, because the reaction was performed in the presence of 50 nM pure RNA, suggesting that the DR needs to be in over molar excess of the target RNA to ensure efficiency hybridization. The decrease in the cleavage efficiency for pure RNA results in a slightly larger than 1  $F_N$  value at 50 nM DR concentration.

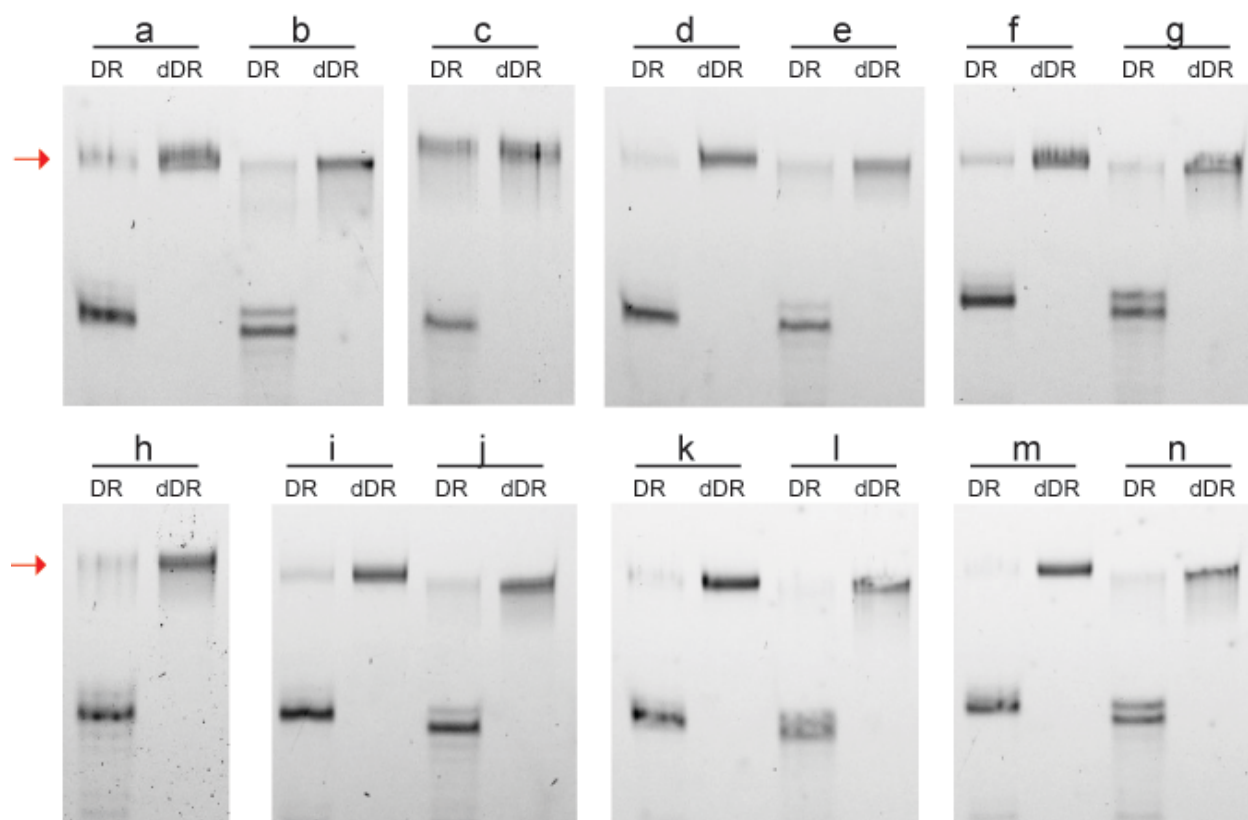

**FIGURE S7.** PAGE showing the DR cleavage efficiency in absence and presence of nearby  $m^6A$ ,  $m^1A$ , and  $\psi$  modifications. Labels a-n correspond to 35-nt synthetic RNAs shown in Figure 6A and listed in Supplemental Table S1. Red arrows point to full-length uncleaved RNA. All gel splice sites are separate by white space.



**Table S1:** Synthetic DNA and RNA sequences.

| Description                                 | Sequence                                                                                                                                                                                                                                                                                                                                                                                                                                                                                                     |
|---------------------------------------------|--------------------------------------------------------------------------------------------------------------------------------------------------------------------------------------------------------------------------------------------------------------------------------------------------------------------------------------------------------------------------------------------------------------------------------------------------------------------------------------------------------------|
| GB DNA template                             | GGTTGCGTTGGGTGTTTCCTGTTTCTTTTGGCCTTGTCTCTGTTTCT<br>TTCCCTTCTCCTCCTTGTCGTGTCTGTTTCGTTTCGTCGCTTTCCTCC<br>TTCCCTGTTCTCGCTCGGACTCTTCTGGGCTCTTCTGCGTTCGCC<br>TTCTTGTTCCTCCTTCTCTGTGGGTCCTGTTCTTGTGCTGGTTGTGC<br>TCCCTCCTCTTGGTGCTCCTCCTTTCTGTGGCTGCGCTGGTGTTCCT<br>TTCTCTCGGCTGCTCTGTTTGTGGGCTTTTGTGTGTGTTGTGTT<br>CTTGTGTGCTGCGTTTTTGGTGGTGTGCGTTCTGTGCTGTCTTCGGC<br>CTGTCGTTTTTCTTCTCGTGTTCGTCCTGTTTTGCGTGTCTCTCCCT<br>GTGTTCCCGCTTTCGCGTGTGGCTGTGCTTGGTGTCTTTCGCTTGTG<br>GTTGGTCTCCTGTCTCCTGTGCTCGTCGGTCTTGTGG |
| 41-nt synthetic <i>ACTB</i> 1216            | CGCAAUUGCUUCUAGGCGGACUAUGACUUAGUUGCGUUACU                                                                                                                                                                                                                                                                                                                                                                                                                                                                    |
| 41-nt synthetic <i>MALAT1</i> 2515          | AGUUUGAAAAAUGUGAAGGACUUUCGUAACGGAAGUAAUUU                                                                                                                                                                                                                                                                                                                                                                                                                                                                    |
| 32-nt synthetic <i>MALAT1</i> 2577          | AACUAAAUGUUUUUGCAUUGGACUUUGAGUUA                                                                                                                                                                                                                                                                                                                                                                                                                                                                             |
| (a) 35-nt synthetic A 2-nt A control 1      | GCCUUGUUCUCGCUCGGACUAUUCUGGGCUCUUUC                                                                                                                                                                                                                                                                                                                                                                                                                                                                          |
| (b) 35-nt synthetic A 2-nt m <sup>6</sup> A | GCCUUGUUCUCGCUCGGACUm <sup>6</sup> AUUCUGGGCUCUUUC                                                                                                                                                                                                                                                                                                                                                                                                                                                           |
| (c) 35-nt synthetic A 2-nt m <sup>1</sup> A | GCCUUGUUCUCGCUCGGACUm <sup>1</sup> AUUCUGGGCUCUUUC                                                                                                                                                                                                                                                                                                                                                                                                                                                           |
| (d) 35-nt synthetic A 2-nt U control        | GCCUUGUUCUCGCUCGGACUUUUCUGGGCUCUUUC                                                                                                                                                                                                                                                                                                                                                                                                                                                                          |
| (e) 35-nt synthetic A 2-nt $\psi$           | GCCUUGUUCUCGCUCGGACU $\psi$ UUCUGGGCUCUUUC                                                                                                                                                                                                                                                                                                                                                                                                                                                                   |
| (f) 35-nt synthetic A 4-nt A control 1      | GCCUUGUUCUCGCUCGGACUCUACUGGGCUCUUUC                                                                                                                                                                                                                                                                                                                                                                                                                                                                          |
| (g) 35-nt synthetic A 4-nt m <sup>6</sup> A | GCCUUGUUCUCGCUCGGACUCUm <sup>6</sup> ACUGGGCUCUUUC                                                                                                                                                                                                                                                                                                                                                                                                                                                           |
| (h) 35-nt synthetic A 4-nt m <sup>1</sup> A | GCCUUGUUCUCGCUCGGACUCUm <sup>1</sup> ACUGGGCUCUUUC                                                                                                                                                                                                                                                                                                                                                                                                                                                           |
| (i) 35-nt synthetic A 4-nt U control        | GCCUUGUUCUCGCUCGGACUCUUCUGGGCUCUUUC                                                                                                                                                                                                                                                                                                                                                                                                                                                                          |
| (j) 35-nt synthetic A 4-nt $\psi$           | GCCUUGUUCUCGCUCGGACUCU $\psi$ CUGGGCUCUUUC                                                                                                                                                                                                                                                                                                                                                                                                                                                                   |
| (k) 35-nt synthetic A 2-nt A control 2      | GCCUUGUUCUCGCUAGGACUCUUCUGGGCUCUUUC                                                                                                                                                                                                                                                                                                                                                                                                                                                                          |
| (l) 35-nt synthetic m <sup>6</sup> A 2-nt A | GCCUUGUUCUCGCUm <sup>6</sup> AGGACUCUUCUGGGCUCUUUC                                                                                                                                                                                                                                                                                                                                                                                                                                                           |
| (m) 35-nt synthetic A 4-nt A control 2      | GCCUUGUUCUCGAUCGGACUCUUCUGGGCUCUUUC                                                                                                                                                                                                                                                                                                                                                                                                                                                                          |
| (n) 35-nt synthetic m <sup>6</sup> A 4-nt A | GCCUUGUUCUCGm <sup>6</sup> AUCGGACUCUUCUGGGCUCUUUC                                                                                                                                                                                                                                                                                                                                                                                                                                                           |

**Table S2:** Primers used for generating templates for *in vitro* transcription.

| Description                                   | Sequence                                |
|-----------------------------------------------|-----------------------------------------|
| Forward primer GB RNA DNA template            | TAATACGACTCACTATAGGGTTGCGTTGGGTGTTCTG   |
| Reverse primer for GB RNA DNA template        | CCACAAGACCGACGAGCACA                    |
| Forward primer for <i>ACTB</i> DNA template   | TAATACGACTCACTATAGGCCAACACAGTGCTGTCTGGC |
| Reverse primer for <i>ACTB</i> DNA template   | CTGCTGTCACCTTCACCGTTCC                  |
| Forward primer for <i>PLAC2</i> DNA template  | TAATACGACTCACTATAGCAAGCAAAGTGAACACGTCC  |
| Reverse primer for <i>PLAC2</i> DNA template  | GTACTGACGTCGGCATCGAT                    |
| Forward primer for <i>MALAT1</i> DNA template | TAATACGACTCACTATAGGCTACTAAAAGGACTGGTGT  |
| Reverse primer for <i>MALAT1</i> DNA template | TTCACCACCAAATCGTTAGC                    |
| Forward primer for <i>LY6K</i> DNA template   | TAATACGACTCACTATAGGCAGGCCATACCACGCAGAAG |
| Reverse primer for <i>LY6K</i> DNA template   | CCAAGACCCTGGGAAGTCAA                    |
| Forward primer for <i>MCM5</i> DNA template   | TAATACGACTCACTATAGGGAGATGCTGAGCCGCATC   |
| Reverse primer for <i>MCM5</i> DNA template   | CAGCAGGACACTACAGCTCC                    |
| Forward primer for <i>SEC11A</i> DNA template | TAATACGACTCACTATAGGGTCTGTGATTGGTGGAATGG |
| Reverse primer for <i>SEC11A</i> DNA template | AAGACTTACGACCACCTCAG                    |
| Forward primer for <i>INCENP</i> DNA template | TAATACGACTCACTATAGATAACCACACCCAGTGCCAG  |
| Reverse primer for <i>INCENP</i> DNA template | TGCGGACAACACTTTCCTGT                    |
| Forward primer for <i>LMO7</i> DNA template   | TAATACGACTCACTATAGGAAATGCTGCAGGACAGGGA  |
| Reverse primer for <i>LMO7</i> DNA template   | TGAGAGCCAAAGGGTCTTGG                    |
| Forward primer for <i>MRPL20</i> DNA template | TAATACGACTCACTATAGGCCGCTACTTTCGGATCCAGG |
| Reverse primer for <i>MRPL20</i> DNA template | GGCCATCCCTCATGTCTGTT                    |

**Table S3:** Deoxyribozyme sequences.

| Description                                | Sequence                                                          |
|--------------------------------------------|-------------------------------------------------------------------|
| GB RNA DR 40-mer                           | CCCAGAAGAGGGGTCTCCAGCTGGACGTTTCGAGCGAGAAC                         |
| GB RNA dDR 40-mer                          | CCCAGAAGAGGGGTCTCCTCGTGGATTTCCGAGCGAGAAC                          |
| GB RNA DR 60-mer                           | GCAGAAAGAGCCCAGAAGAGGGGTCTCCAGCTGGACGTT<br>CGAGCGAGAACAAGGAAGGAG  |
| GB RNA dDR 60-mer                          | GCAGAAAGAGCCCAGAAGAGGGGTCTCCTCGTGGATTTCC<br>GAGCGAGAACAAGGAAGGAG  |
| <i>PLAC2</i> m <sup>6</sup> A 1 DR 40-mer  | CCTCTGAGTGGGGTCTCCAGCTGGACGTTACTCCTGCCCC                          |
| <i>PLAC2</i> m <sup>6</sup> A 2 DR 40-mer  | TGGGAAAATGGGGTCTCCAGCTGGACGTTCTGGGCAAGAG                          |
| <i>PLAC2</i> m <sup>6</sup> A 1 dDR 40-mer | CCTCTGAGTGGGGTCTCCTCGTGGATTTCACTCCTGCCCC                          |
| <i>PLAC2</i> m <sup>6</sup> A 2 dDR 40-mer | TGGGAAAATGGGGTCTCCTCGTGGATTTCTGGGCAAGAG                           |
| <i>PLAC2</i> m <sup>6</sup> A 1 DR 60-mer  | AGCGGAAGTGCCTCTGAGTGGGGTCTCCAGCTGGACGTTA<br>CTCCTGCCCCCTTCTGTGCTT |
| <i>PLAC2</i> m <sup>6</sup> A 2 DR 60-mer  | AAGGTGTGGCTGGGAAAATGGGGTCTCCAGCTGGACGTTT<br>TGGGCAAGAGCGGAAGTGCC  |
| <i>PLAC2</i> m <sup>6</sup> A 1 dDR 60-mer | AGCGGAAGTGCCTCTGAGTGGGGTCTCCTCGTGGATTTCA<br>CTCCTGCCCCCTTCTGTGCTT |
| <i>PLAC2</i> m <sup>6</sup> A 2 dDR 60-mer | AAGGTGTGGCTGGGAAAATGGGGTCTCCTCGTGGATTTCC<br>TGGGCAAGAGCGGAAGTGCC  |
| <i>ACTB</i> 1165 DR 40-mer                 | CTCGTCATACGGGTCTCCAGCTGGACGTTCTGCTTGCTGA                          |
| <i>ACTB</i> 1165 dDR 40-mer                | CTCGTCATACGGGTCTCCTCGTGGATTTCTGCTTGCTGA                           |
| <i>ACTB</i> 1165 DR 60-mer                 | AGGGGCCGGACTCGTCATACGGGTCTCCAGCTGGACGTTT<br>TGCTTGCTGATCCACATCTG  |
| <i>ACTB</i> 1165 dDR 60-mer                | AGGGGCCGGACTCGTCATACGGGTCTCCTCGTGGATTTCT<br>GCTTGCTGATCCACATCTG   |
| <i>ACTB</i> 1216 DR 60-mer                 | GTAACGCAACTAAGTCATAGGGGTCTCCAGCTGGACGTTT<br>GCCTAGAAGCATTTGCGGTG  |
| <i>ACTB</i> 1216 dDR 60-mer                | GTAACGCAACTAAGTCATAGGGGTCTCCTCGTGGATTTCT<br>GCCTAGAAGCATTTGCGGTG  |
| <i>MALAT1</i> 2515 DR 60-mer               | AATTACTTCCGTTACGAAAGGGGTCTCCAGCTGGACGTTCT<br>TCACATTTTTCAAATAAG   |
| <i>MALAT1</i> 2515 dDR 60-mer              | AATTACTTCCGTTACGAAAGGGGTCTCCTCGTGGATTTCT<br>TCACATTTTTCAAATAAG    |
| <i>MALAT1</i> 2577 DR 60-mer               | AAAATAATCTTAACTCAAAGGGGTCTCCAGCTGGACGTTT<br>AATGCAAAAACATTAAGTTG  |
| <i>MALAT1</i> 2577 dDR 60-mer              | AAAATAATCTTAACTCAAAGGGGTCTCCTCGTGGATTTCT<br>AATGCAAAAACATTAAGTTG  |
| <i>MALAT1</i> 2611 DR 60-mer               | CAGCTGTCAATTAATGCTAGGGGTCTCCAGCTGGACGTTCT<br>CAGGATTTAAAAATAATC   |
| <i>MALAT1</i> 2611 dDR 60-mer              | CAGCTGTCAATTAATGCTAGGGGTCTCCTCGTGGATTTCT<br>CAGGATTTAAAAATAATC    |
| <i>LY6K</i> DR 60-mer                      | GAAGGCTCAGTCTGTGGCAGGGGTCTCCAGCTGGACGTTT<br>CGTGGCTCAAGACAGGCTGA  |
| <i>LY6K</i> dDR 60-mer                     | GAAGGCTCAGTCTGTGGCAGGGGTCTCCTCGTGGATTTCT<br>CGTGGCTCAAGACAGGCTGA  |

|                               |                                                                   |
|-------------------------------|-------------------------------------------------------------------|
| <i>MCM5</i> DR 60-mer         | CAGAGGTCCCAGCAACATTGGGGTCTCCAGCTGGACGTTA<br>ATGGCAGGCAGCGGCAGGAG  |
| <i>MCM5</i> dDR 60-mer        | CAGAGGTCCCAGCAACATTGGGGTCTCCTCGTGGATTCA<br>ATGGCAGGCAGCGGCAGGAG   |
| <i>SEC11A</i> DR 60-mer       | GCTGCATTTTCATTTACAAGGGGTCTCCAGCTGGACGTTTC<br>TGTAGGCACTTTAGAAGTG  |
| <i>SEC11A</i> dDR 60-mer      | GCTGCATTTTCATTTACAAGGGGTCTCCTCGTGGATTCTC<br>TGTAGGCACTTTAGAAGTG   |
| <i>INCENP</i> 912 DR 60-mer   | CTTAGACGCAGACCGCCCCGGGGTCTCCAGCTGGACGTTTC<br>CGACCCCTTGACCCTTGGGG |
| <i>INCENP</i> 912 dDR 60-mer  | CTTAGACGCAGACCGCCCCGGGGTCTCCTCGTGGATTTC<br>GACCCCTTGACCCTTGGGG    |
| <i>INCENP</i> 967 DR 60-mer   | AATCTGGAAAGGCTGGCGAGGGGTCTCCAGCTGGACGTTTC<br>CGTGGGCCAGGGGAGACCTG |
| <i>INCENP</i> 967 dDR 60-mer  | AATCTGGAAAGGCTGGCGAGGGGTCTCCTCGTGGATTTC<br>CGTGGGCCAGGGGAGACCTG   |
| <i>INCENP</i> 1060 DR 60-mer  | TGTGCCGCACCGATTGAGAGGGGTCTCCAGCTGGACGTTTC<br>GTGCGAGAGCCCGTGGGCGT |
| <i>INCENP</i> 1060 dDR 60-mer | TGTGCCGCACCGATTGAGAGGGGTCTCCTCGTGGATTTC<br>GTGCGAGAGCCCGTGGGCGT   |
| <i>LMO7</i> DR 60-mer         | GAATTCAGTTGTTACACGGGGTCTCCAGCTGGACGTTCT<br>CTCTTTTGGCAAAGTGGT     |
| <i>LMO7</i> dDR 60-mer        | GAATTCAGTTGTTACACGGGGTCTCCTCGTGGATTTCCT<br>CTCTTTTGGCAAAGTGGT     |
| <i>MRPL20</i> DR 60-mer       | CCTAATCAATACAGCAACAGGGGTCTCCAGCTGGACGTTTC<br>TCAGTGGTACTGCACCACTC |
| <i>MRPL20</i> dDR 60-mer      | CCTAATCAATACAGCAACAGGGGTCTCCTCGTGGATTTCCT<br>CAGTGGTACTGCACCACTC  |

**Table S4:** Primers for reverse transcription and qPCR.

| Description                                                          | Sequence                 |
|----------------------------------------------------------------------|--------------------------|
| Forward primer GB RNA m <sup>6</sup> A region                        | GGTTGCGTTGGGTGTTTCCTG    |
| Reverse primer for GB RNA m <sup>6</sup> A region                    | GGGAGAACAAGAAGGGCGAA     |
| Forward primer for GB RNA control region                             | CGTCCTGTTTTGCGTGTCTC     |
| Reverse primer for GB RNA control region                             | CCACAAGACCGACGAGCACA     |
| Forward primer for <i>ACTB</i> m <sup>6</sup> A region               | CCTTCCAGCAGATGTGGATC     |
| Reverse primer for <i>ACTB</i> m <sup>6</sup> A region               | GCCATGCCAATCTCATCTTG     |
| Forward primer for <i>ACTB</i> control region                        | CAGGATGCAGAAGGAGATCAC    |
| Reverse primer for <i>ACTB</i> control region                        | CGATCCACACGGAGTACTTG     |
| Forward primer for <i>PLAC2</i> m <sup>6</sup> A region              | AAGAGAAGCACAGAAGGGGC     |
| Reverse primer for <i>PLAC2</i> m <sup>6</sup> A region              | ACGGCTTGGGCAAAGGTGTG     |
| Forward primer for <i>PLAC2</i> control region                       | CAAGCAAAGTGAACACGTCG     |
| Reverse primer for <i>PLAC2</i> control region                       | TCACTTTAACTTGCACCTTACTGC |
| Forward primer for <i>MALAT1</i> m <sup>6</sup> A region             | GGCAGAAGGCTTTTGAAGAGT    |
| Reverse primer for <i>MALAT1</i> m <sup>6</sup> A region             | CTGGGTCAGCTGTCAATTAATGC  |
| Forward primer for <i>MALAT1</i> control region                      | CAGCAGCAGACAGGATTCCA     |
| Reverse primer for <i>MALAT1</i> control region                      | TCCTATCTTCACCACGAAGTGC   |
| Forward primer for <i>LY6K</i> m <sup>6</sup> A region               | GGCCTCAGCCTGTCTTGA       |
| Reverse primer for <i>LY6K</i> m <sup>6</sup> A region               | AATGCAACAGGTGACAACGG     |
| Forward primer for <i>LY6K</i> control region                        | TGACTGTGCACCTTTGAGCA     |
| Reverse primer for <i>LY6K</i> control region                        | ACCGAGAGAAGGCAATCACG     |
| Forward primer for <i>MCM5</i> m <sup>6</sup> A region               | TCACTGGACTCATGGACTCG     |
| Reverse primer for <i>MCM5</i> m <sup>6</sup> A region               | AAGTTCGAGGGCTGCAGT       |
| Forward primer for <i>MCM5</i> control region                        | GAGCACAGCATCATCAAGGA     |
| Reverse primer for <i>MCM5</i> control region                        | TGCATGCGATGCTGGATCT      |
| Forward primer for <i>SEC11A</i> m <sup>6</sup> A region             | CAAAGCCCCAGTGTGTTGTA     |
| Reverse primer for <i>SEC11A</i> m <sup>6</sup> A region             | CGTGCAGAGCTGCATTTTCAT    |
| Forward primer for <i>SEC11A</i> control region                      | CACTCGAGGGGACTTTCAGT     |
| Reverse primer for <i>SEC11A</i> control region                      | GGCTTTGGCTCAACCTTTTAAT   |
| Forward primer for <i>INCENP</i> 912 and 967 m <sup>6</sup> A region | TGAGCTCCCTGATGGCTACA     |
| Reverse primer for <i>INCENP</i> 912 and 967 m <sup>6</sup> A region | CTCCCGCCATGGAGAATCTG     |
| Forward primer for <i>INCENP</i> 1060 m <sup>6</sup> A region        | CTCCCATCCTGCCGGATAAC     |
| Reverse primer for <i>INCENP</i> 1060 m <sup>6</sup> A region        | TGGGCTAAGACTTGGGGACT     |
| Forward primer for <i>INCENP</i> control region                      | CATCAGTGAGCGCCAGAATG     |
| Reverse primer for <i>INCENP</i> control region                      | TGATGTGCGGGATGCCCTG      |
| Forward primer for <i>LMO7</i> m <sup>6</sup> A region               | GAGAGAGTAGAAGAGAAGGG     |
| Reverse primer for <i>LMO7</i> m <sup>6</sup> A region               | CAAAGAGGCTGGGCTTTGTTTC   |
| Forward primer for <i>LMO7</i> control region                        | TCACGGAGCACACAAATGGA     |
| Reverse primer for <i>LMO7</i> control region                        | TGAGAGCCAAAGGGTCTTGG     |
| Forward primer for <i>MRPL20</i> m <sup>6</sup> A region             | GGGAAGGAACCTGAAGGCAT     |
| Reverse primer for <i>MRPL20</i> m <sup>6</sup> A region             | TGCAAATTACTCTGTCTCTTTTCC |
| Forward primer for <i>MRPL20</i> control region                      | CCAAAGCCCGATACCTGAAGA    |
| Reverse primer for <i>MRPL20</i> control region                      | GCTCCACCTGGCACTTAACTA    |
